# Supplementary material for: Association of Longitudinal Urinary Metabolic Biomarkers With ADPKD Severity and Response to Metformin in TAME-PKD Clinical Trial Participants
Source: PubMed Central journal article supplement — Kidney Int Rep. 2022 Dec 5;8(3):467–77. doi: 10.1016/j.ekir.2022.11.019 (PMC10014337; doi:10.1016/j.ekir.2022.11.019), 2022-12-05

**Supplementary Table S1: Distribution of the Number of Samples for Each Participant**

| <b>Number of samples</b> | <b>Metformin participants</b> | <b>Placebo participants</b> | <b>Total participants</b> | <b>Total samples</b> |
|--------------------------|-------------------------------|-----------------------------|---------------------------|----------------------|
| 10                       | 29                            | 28                          | 57                        | 570                  |
| 9                        | 8                             | 7                           | 15                        | 135                  |
| 8                        | 2                             | 4                           | 6                         | 48                   |
| 7                        | 1                             | 3                           | 4                         | 28                   |
| 6                        | 1                             | 0                           | 1                         | 6                    |
| 5                        | 1                             | 2                           | 3                         | 15                   |
| 4                        | 1                             | 1                           | 2                         | 8                    |
| 3                        | 1                             | 2                           | 3                         | 9                    |
| 2                        | 1                             | 0                           | 1                         | 2                    |
| 1                        | 4                             | 1                           | 5                         | 5                    |
| <b>Total</b>             | <b>49</b>                     | <b>48</b>                   | <b>97</b>                 | <b>826</b>           |

**Supplementary Table S2: Baseline Characteristics by Randomized Arm**

| Characteristic *                                                   | Metformin<br>(n=49) | Placebo<br>(n=48) | Total<br>(N=97) |
|--------------------------------------------------------------------|---------------------|-------------------|-----------------|
| <b>Age (years) (at Screening)</b>                                  | 41.8 (10.4)         | 42.1 (10.1)       | 41.9 (10.2)     |
| <b>Sex</b>                                                         |                     |                   |                 |
| Male                                                               | 11 (22.4%)          | 16 (33.3%)        | 27 (27.8%)      |
| Female                                                             | 38 (77.6%)          | 32 (66.7%)        | 70 (72.2%)      |
| <b>Race</b>                                                        |                     |                   |                 |
| American Indian or Alaska Native                                   | 1 (2.0%)            | 0 (0.0%)          | 1 (1.0%)        |
| Asian                                                              | 2 (4.1%)            | 1 (2.1%)          | 3 (3.1%)        |
| Black or African American                                          | 0 (0.0%)            | 1 (2.1%)          | 1 (1.0%)        |
| White or Caucasian                                                 | 46 (93.9%)          | 46 (95.8%)        | 92 (94.8%)      |
| <b>Ethnicity</b>                                                   |                     |                   |                 |
| Hispanic or Latino                                                 | 2 (4.1%)            | 6 (12.5%)         | 8 (8.2%)        |
| Not Hispanic or Latino                                             | 47 (95.9%)          | 42 (87.5%)        | 89 (91.8%)      |
| <b>PKD genotype</b>                                                |                     |                   |                 |
| PKD1                                                               | 37 (78.7%)          | 28 (60.9%)        | 65 (69.9%)      |
| PKD2                                                               | 7 (14.9%)           | 10 (21.7%)        | 17 (18.3%)      |
| Other                                                              | 1 (2.1%)            | 4 (8.7%)          | 5 (5.4%)        |
| No mutation detected                                               | 2 (4.3%)            | 4 (8.7%)          | 6 (6.5%)        |
| <b>GFR calculated per CKD-EPI (ml/min/1.73 m<sup>2</sup>)</b>      | 86.1 (20.6)         | 85.9 (19.0)       | 86.0 (19.7)     |
| <b>Vitamin B12 (pg/mL)</b>                                         | 580.7 (350.8)       | 495.3 (202.3)     | 538.4 (288.8)   |
| <b>Glucose (mg/dL)</b>                                             | 88.6 (8.4)          | 90.9 (9.1)        | 89.7 (8.8)      |
| <b>HbA1c (%)</b>                                                   | 5.2 (0.3)           | 5.2 (0.3)         | 5.2 (0.3)       |
| <b>Serum Creatinine (mg/dL)</b>                                    | 0.9 (0.2)           | 0.9 (0.2)         | 0.9 (0.2)       |
| <b>Systolic BP (mmHg)</b>                                          | 122.2 (13.1)        | 124.1 (13.0)      | 123.1 (13.0)    |
| <b>Diastolic BP (mmHg)</b>                                         | 76.8 (8.9)          | 74.6 (8.5)        | 75.7 (8.7)      |
| <b>Weight (kg)</b>                                                 | 78.5 (16.9)         | 78.2 (17.4)       | 78.4 (17.0)     |
| <b>BMI</b>                                                         | 27.0 (5.9)          | 26.6 (4.5)        | 26.8 (5.2)      |
| <b>Mayo Imaging Class</b>                                          |                     |                   |                 |
| Class 2                                                            | 2 (4.2%)            | 5 (10.4%)         | 7 (7.3%)        |
| Class 1A                                                           | 9 (18.8%)           | 6 (12.5%)         | 15 (15.6%)      |
| Class 1B                                                           | 13 (27.1%)          | 15 (31.3%)        | 28 (29.2%)      |
| Class 1C                                                           | 14 (29.2%)          | 12 (25.0%)        | 26 (27.1%)      |
| Class 1D                                                           | 6 (12.5%)           | 6 (12.5%)         | 12 (12.5%)      |
| Class 1E                                                           | 4 (8.3%)            | 4 (8.3%)          | 8 (8.3%)        |
| <b>Height-adjusted total kidney volume (mL/m)</b>                  | 625.8 (386.5)       | 750.9 (547.8)     | 688.4 (475.7)   |
| <b>Height-adjusted total hemorrhagic kidney cyst volume (mL/m)</b> | 24.5 (48.0)         | 22.1 (46.1)       | 23.3 (46.8)     |
| <b>Height-adjusted total simple kidney cyst volume (mL/m)</b>      | 332.4 (347.9)       | 456.0 (493.3)     | 394.2 (429.1)   |
| <b>Height-adjusted total kidney cyst volume (mL/m)</b>             | 356.9 (358.7)       | 478.2 (520.4)     | 417.5 (448.7)   |
| <b>Height-adjusted liver volume (mL/m)</b>                         | 1,224.1 (490.7)     | 1,019.0 (212.6)   | 1,121.6 (390.0) |
| <b>Height-adjusted liver cyst volume (mL/m)</b>                    | 238.2 (452.0)       | 81.0 (166.7)      | 159.6 (348.0)   |
| <b>Site</b>                                                        |                     |                   |                 |
| Tufts                                                              | 24 (49.0%)          | 23 (47.9%)        | 47 (48.5%)      |
| UMD                                                                | 25 (51.0%)          | 25 (52.1%)        | 50 (51.5%)      |

| Characteristic *                            | Metformin (n=49)  | Placebo (n=48)    | Total (N=97)      |
|---------------------------------------------|-------------------|-------------------|-------------------|
| <b>Age at time of PKD diagnosis (years)</b> | 28.6 (12.4)       | 31.3 (11.2)       | 29.9 (11.9)       |
| <b>Diagnosis was due to</b>                 |                   |                   |                   |
| Screening (family history)                  | 11 (22.4%)        | 16 (33.3%)        | 27 (27.8%)        |
| Incidental Imaging                          | 12 (24.5%)        | 9 (18.8%)         | 21 (21.6%)        |
| Pain                                        | 13 (26.5%)        | 10 (20.8%)        | 23 (23.7%)        |
| Hypertension                                | 3 (6.1%)          | 6 (12.5%)         | 9 (9.3%)          |
| Routine Physical                            | 5 (10.2%)         | 1 (2.1%)          | 6 (6.2%)          |
| Hematuria                                   | 3 (6.1%)          | 2 (4.2%)          | 5 (5.2%)          |
| UTI                                         | 2 (4.1%)          | 4 (8.3%)          | 6 (6.2%)          |
| <b>Method of diagnostic imaging</b>         |                   |                   |                   |
| Ultrasound                                  | 36 (73.5%)        | 33 (68.8%)        | 69 (71.1%)        |
| CT                                          | 6 (12.2%)         | 8 (16.7%)         | 14 (14.4%)        |
| MRI                                         | 4 (8.2%)          | 6 (12.5%)         | 10 (10.3%)        |
| Unknown                                     | 3 (6.1%)          | 1 (2.1%)          | 4 (4.1%)          |
| <b>Family history of ADPKD</b>              |                   |                   |                   |
| No                                          | 9 (18.4%)         | 11 (22.9%)        | 20 (20.6%)        |
| Yes                                         | 38 (77.6%)        | 34 (70.8%)        | 72 (74.2%)        |
| Unknown                                     | 2 (4.1%)          | 3 (6.3%)          | 5 (5.2%)          |
| <b>Urine Biomarkers</b>                     |                   |                   |                   |
| Urine Creatinine (Ucrea; mg/dL)             | 56.083 (46.851)   | 65.700 (45.053)   | 60.739 (45.999)   |
| Urine Osmolality (Uosm; mmol/kg)            | 387.306 (234.674) | 409.891 (206.320) | 398.242 (220.520) |
| Urine Lactate (µM)/Ucrea                    | 0.298 (0.350)     | 0.311 (0.406)     | 0.305 (0.376)     |
| Urine Lactate (µM)/Uosm                     | 0.038 (0.037)     | 0.039 (0.036)     | 0.039 (0.036)     |
| Urine Lactate/Pyruvate                      | 1.959 (2.339)     | 1.228 (0.668)     | 1.605 (1.773)     |
| Urine Succinate (µM)/Ucrea                  | 1.129 (1.018)     | 1.048 (1.095)     | 1.090 (1.051)     |
| Urine Succinate (µM)/Uosm                   | 0.131 (0.104)     | 0.132 (0.096)     | 0.132 (0.099)     |
| Urine Pyruvate (µM)/Ucrea                   | 0.239 (0.218)     | 0.234 (0.186)     | 0.237 (0.202)     |
| Urine Pyruvate (µM)/Uosm                    | 0.027 (0.018)     | 0.030 (0.014)     | 0.029 (0.016)     |
| Urine Total Protein (mg/dL)/Ucrea           | 0.199 (0.199)     | 0.145 (0.123)     | 0.173 (0.168)     |
| Urine Total Protein (mg/dL)/Uosm            | 0.028 (0.036)     | 0.022 (0.021)     | 0.025 (0.030)     |
| Urine PKM2 (ng/mL)/Ucrea                    | 0.153 (0.144)     | 0.144 (0.113)     | 0.149 (0.129)     |
| Urine PKM2 (ng/mL)/Uosm                     | 0.020 (0.022)     | 0.021 (0.014)     | 0.021 (0.018)     |
| Urine LDHA (ng/mL)/Ucrea                    | 0.063 (0.070)     | 0.050 (0.048)     | 0.057 (0.060)     |
| Urine LDHA (ng/mL)/Uosm                     | 0.008 (0.010)     | 0.008 (0.010)     | 0.008 (0.010)     |
| Urine PDK1 (pg/mL)/Ucrea                    | 5.532 (4.254)     | 4.019 (2.839)     | 4.799 (3.698)     |
| Urine PDK1 (pg/mL)/Uosm                     | 0.720 (0.710)     | 0.527 (0.295)     | 0.626 (0.555)     |

\* Continuous variables described as mean (SD) and categorical variables as n (%)

**Supplementary Figure S1 – Number of samples for each participant over time.** Graph shows total number of samples collected and analyzed at each study visit (*black*), along with the number of samples for metformin-treated subjects (*blue*) and placebo group subjects (*red*) throughout the 24-month study period.

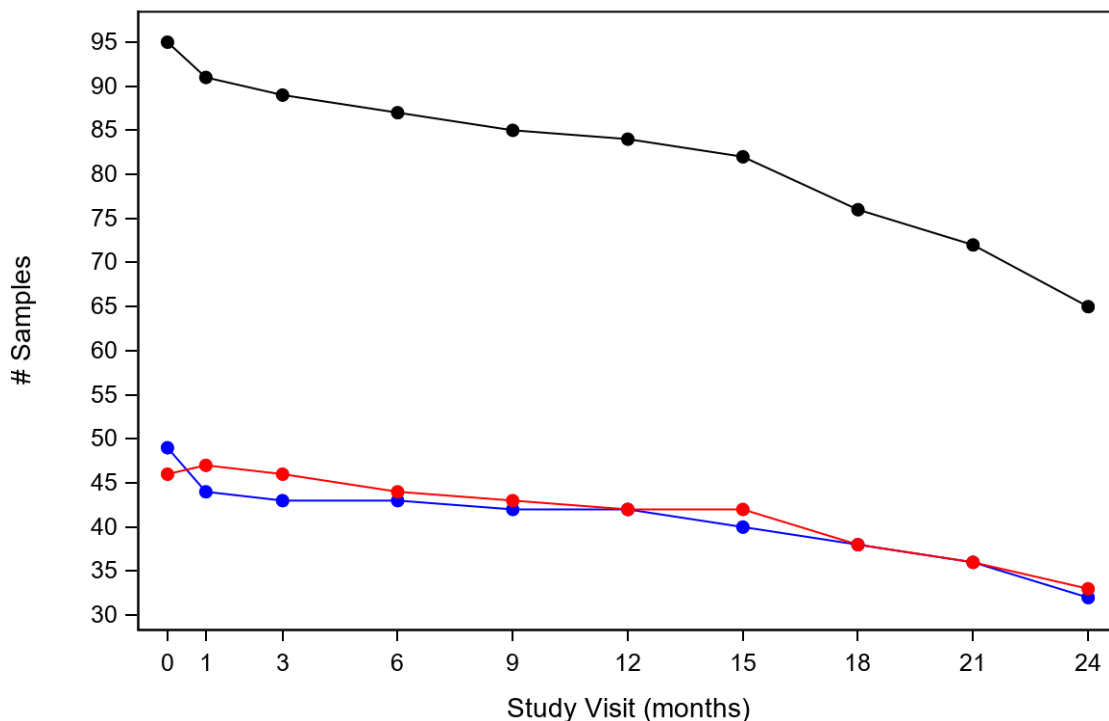

|           | No. of participants by Arm |    |    |    |    |    |    |    |    |    |
|-----------|----------------------------|----|----|----|----|----|----|----|----|----|
|           | 0                          | 1  | 3  | 6  | 9  | 12 | 15 | 18 | 21 | 24 |
| Metformin | 49                         | 44 | 43 | 43 | 42 | 42 | 40 | 38 | 36 | 32 |
| Placebo   | 46                         | 47 | 46 | 44 | 43 | 42 | 42 | 38 | 36 | 33 |
| Total     | 95                         | 91 | 89 | 87 | 85 | 84 | 82 | 76 | 72 | 65 |

**Supplementary Figure S2 – Representative image of urine protein staining from aliquots of 20 baseline participants’ specimens subjected to SDS-PAGE and transfer to nitrocellulose membrane.** Albumin (~67 kDa) and the Tamm-Horsfall glycoprotein (Uromodulin; ~100 kDa) are generally the two most abundant proteins expressed. However, overall and relative protein expression levels of these two major proteins are highly variable across the different study participants.

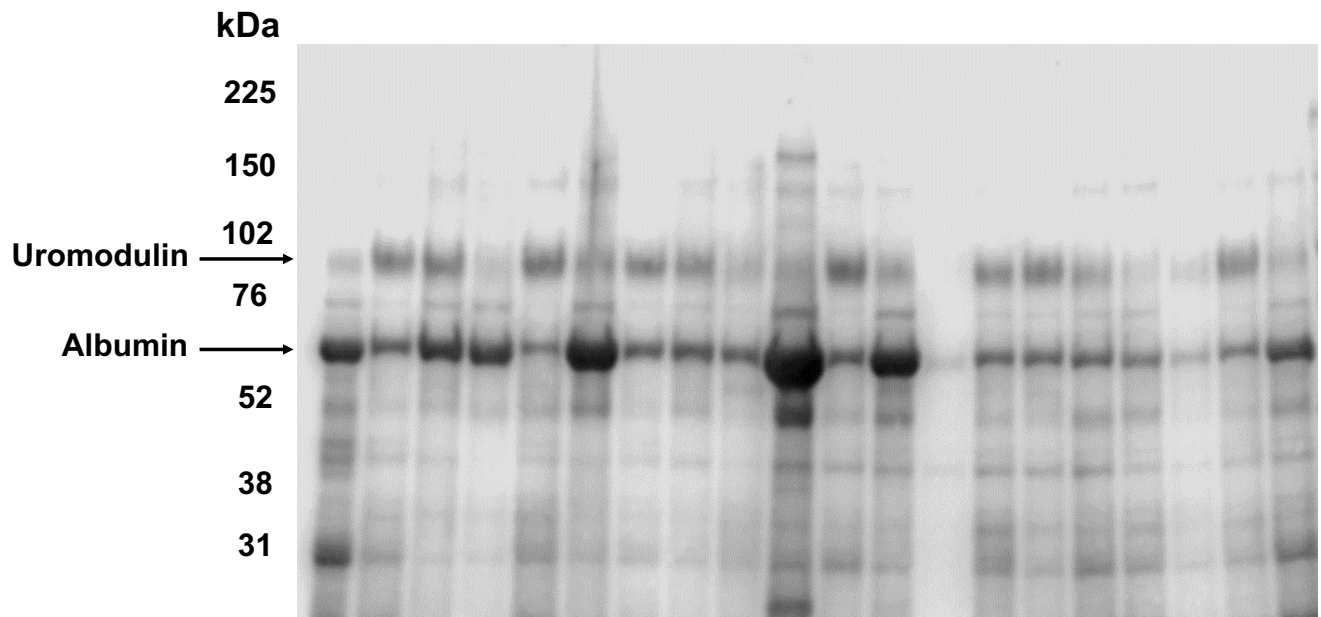

**Supplementary Figure S3 – Scatter plot of the association between  $\ln(\text{urinary osmolality})$  and  $\ln(\text{urinary creatinine})$  for each sample.** Samples from metformin-treated subjects are indicated by filled circles while samples from placebo group subjects are indicated by open diamonds. Linear least-squares regression fit of the data and equation is shown. The correlation of  $\ln(\text{UOsmolality})$  and  $\ln(\text{UCreatinine})$  is high ( $R^2 = 0.5902$ ;  $P < 0.0001$ ;  $N = 889$ ).

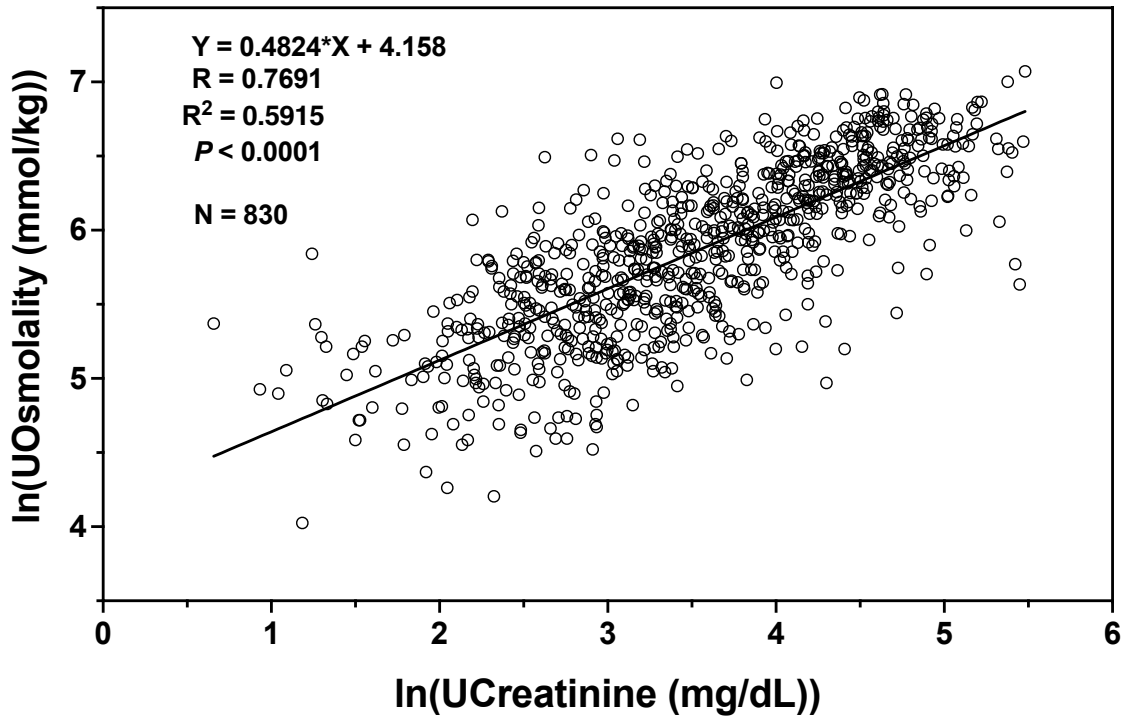

Supplement: mmc1.pdf [file mmc1.pdf]
